# Supplementary material for: Connecting particle clustering and rheology in attractive particle networks
Source: Royal Society of Chemistry journal article supplement (doi:10.1039/d0sm00861c), 2020-01-01
Supplement: d0sm00861c1.pdf [file d0sm00861c1.pdf]

# Connecting particle clustering and rheology in attractive particle networks: Supplementary information

Sebastian Bindgen, Frank Bossler<sup>‡</sup>, Jens Allard, and Erin Koos\*

KU Leuven, Chemical Engineering Department, Celestijnenlaan 200f, box 2424,  
3001 Leuven, Belgium

\* E-mail: erin.koos@kuleuven.be

<sup>‡</sup>Present address: Zeppelinstraße 1c, 85375 Neufahrn, Germany

## List of Figures

|     |                                                                                                                             |    |
|-----|-----------------------------------------------------------------------------------------------------------------------------|----|
| S1  | Example amplitude sweep data for two $\theta = 87 \pm 8^\circ$ samples. . . . .                                             | 2  |
| S2  | Confocal 2D images of phase separated samples . . . . .                                                                     | 2  |
| S3  | Representative 3D structures for points I, II and III for $\theta = 87 \pm 8^\circ$ . . . .                                 | 3  |
| S4  | Representative 3D structures for points IV, V and VI for $\theta = 87 \pm 8^\circ$ . . .                                    | 4  |
| S5  | Representative 3D structures for points VII, VIII and IX for $\theta = 87 \pm 8^\circ$ .                                    | 5  |
| S6  | Representative 3D structures for points I, II and III for $\theta = 115 \pm 8^\circ$ . . .                                  | 6  |
| S7  | Representative 3D structures for points IV, V and VI for $\theta = 115 \pm 8^\circ$ . .                                     | 7  |
| S8  | Representative 3D structures for points VII, VIII and IX for $\theta = 115 \pm 8^\circ$ .                                   | 8  |
| S9  | Zoom of the structural parameters for $\theta = 87 \pm 8^\circ$ sample for low values<br>of added, secondary fluid. . . . . | 9  |
| S10 | Dependence of different values for the clustering coefficient on the amount<br>of added, secondary fluid . . . . .          | 9  |
| S11 | Direct relationship between the structural parameters and dynamic moduli.                                                   | 10 |
| S12 | Histograms of betweenness centrality and corresponding averages for the<br>$\theta = 87 \pm 8^\circ$ samples. . . . .       | 11 |
| S13 | Histograms of betweenness centrality and corresponding averages for the<br>$\theta = 115 \pm 8^\circ$ . . . . .             | 12 |

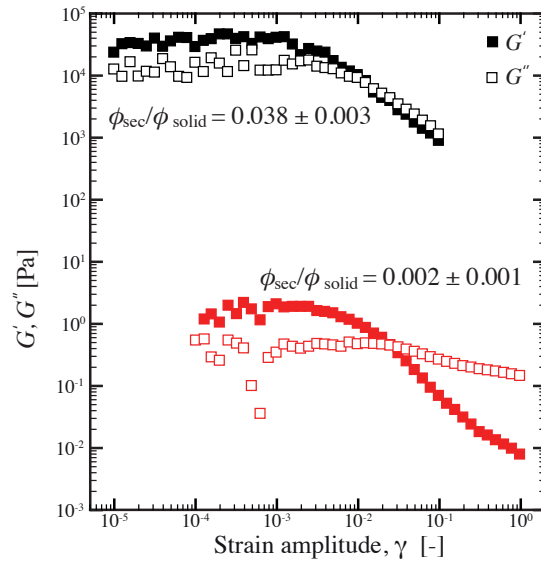

Figure S1: Example amplitude sweep data for two  $\theta = 87 \pm 8^\circ$  samples.

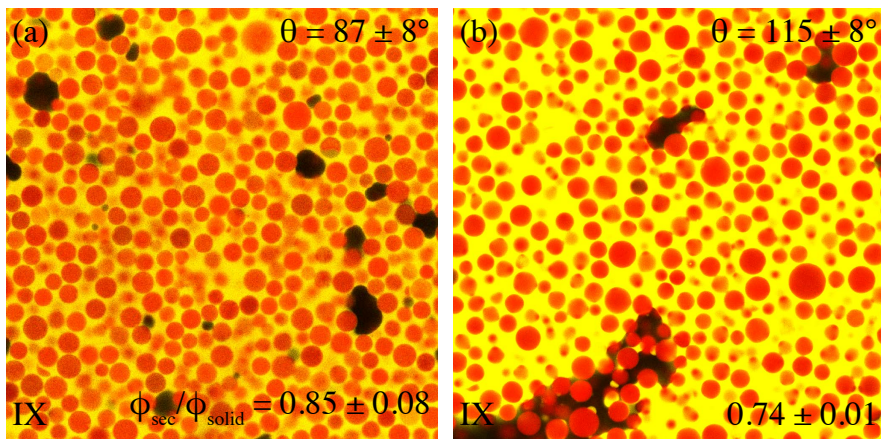

Figure S2: Confocal 2D images of phase separated samples (point IX) with (a)  $\theta = 87 \pm 8^\circ$  and (b)  $\theta = 115 \pm 8^\circ$ .

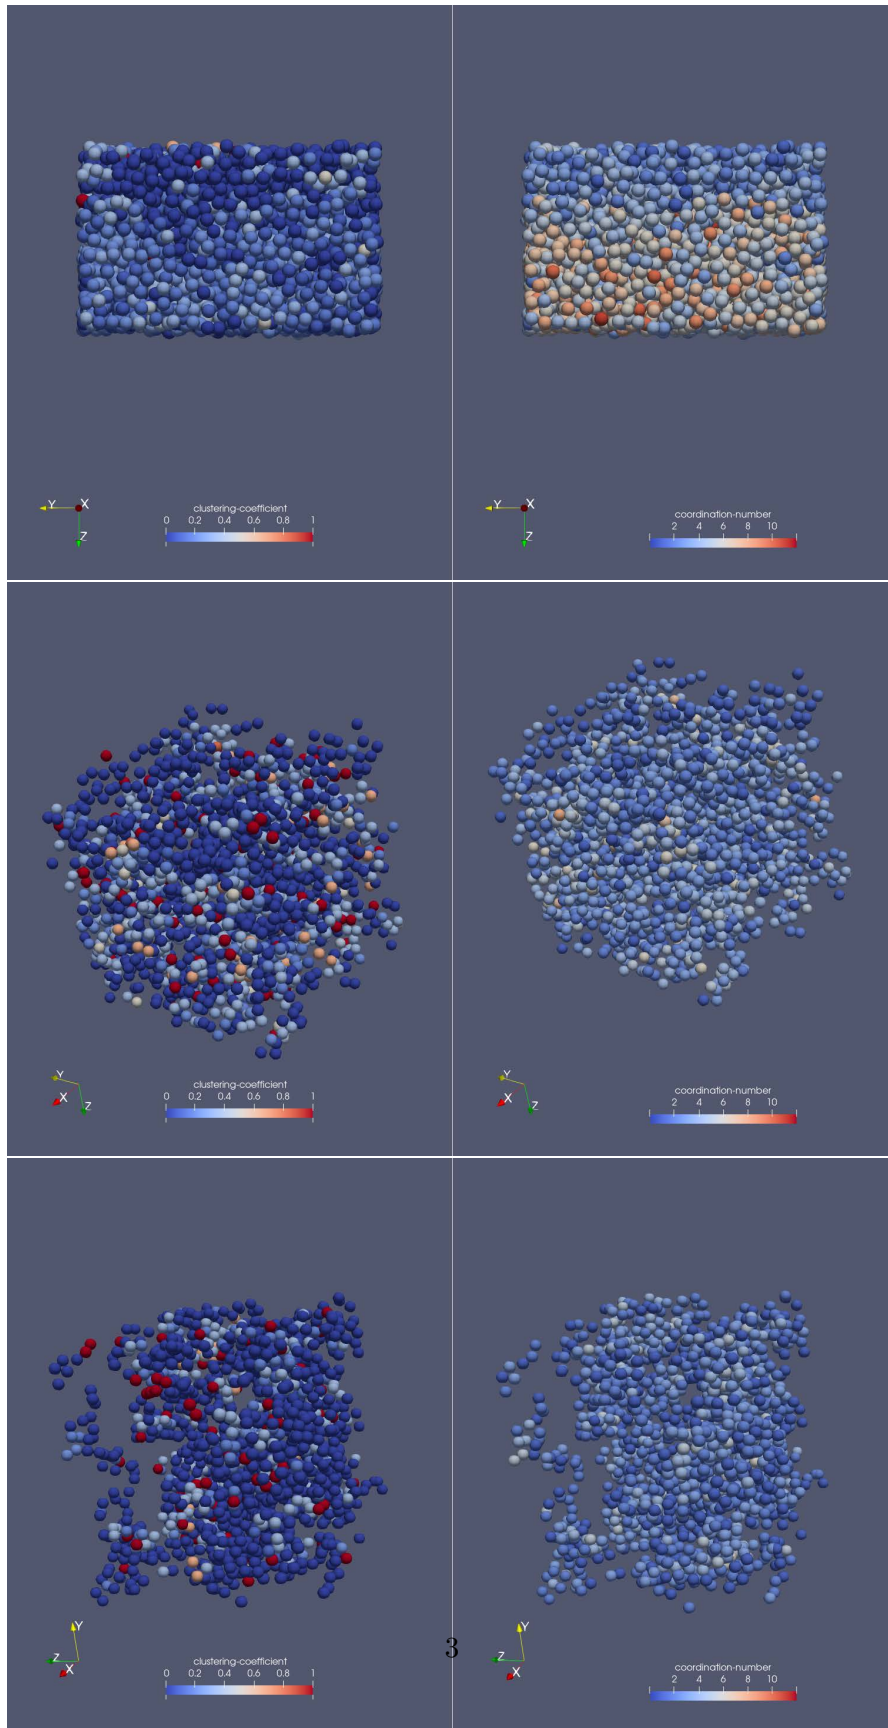

Figure S3: Representative 3D structures for points I, II and III with a contact angle of  $\theta = 87 \pm 8^\circ$  for several amounts of secondary fluid.

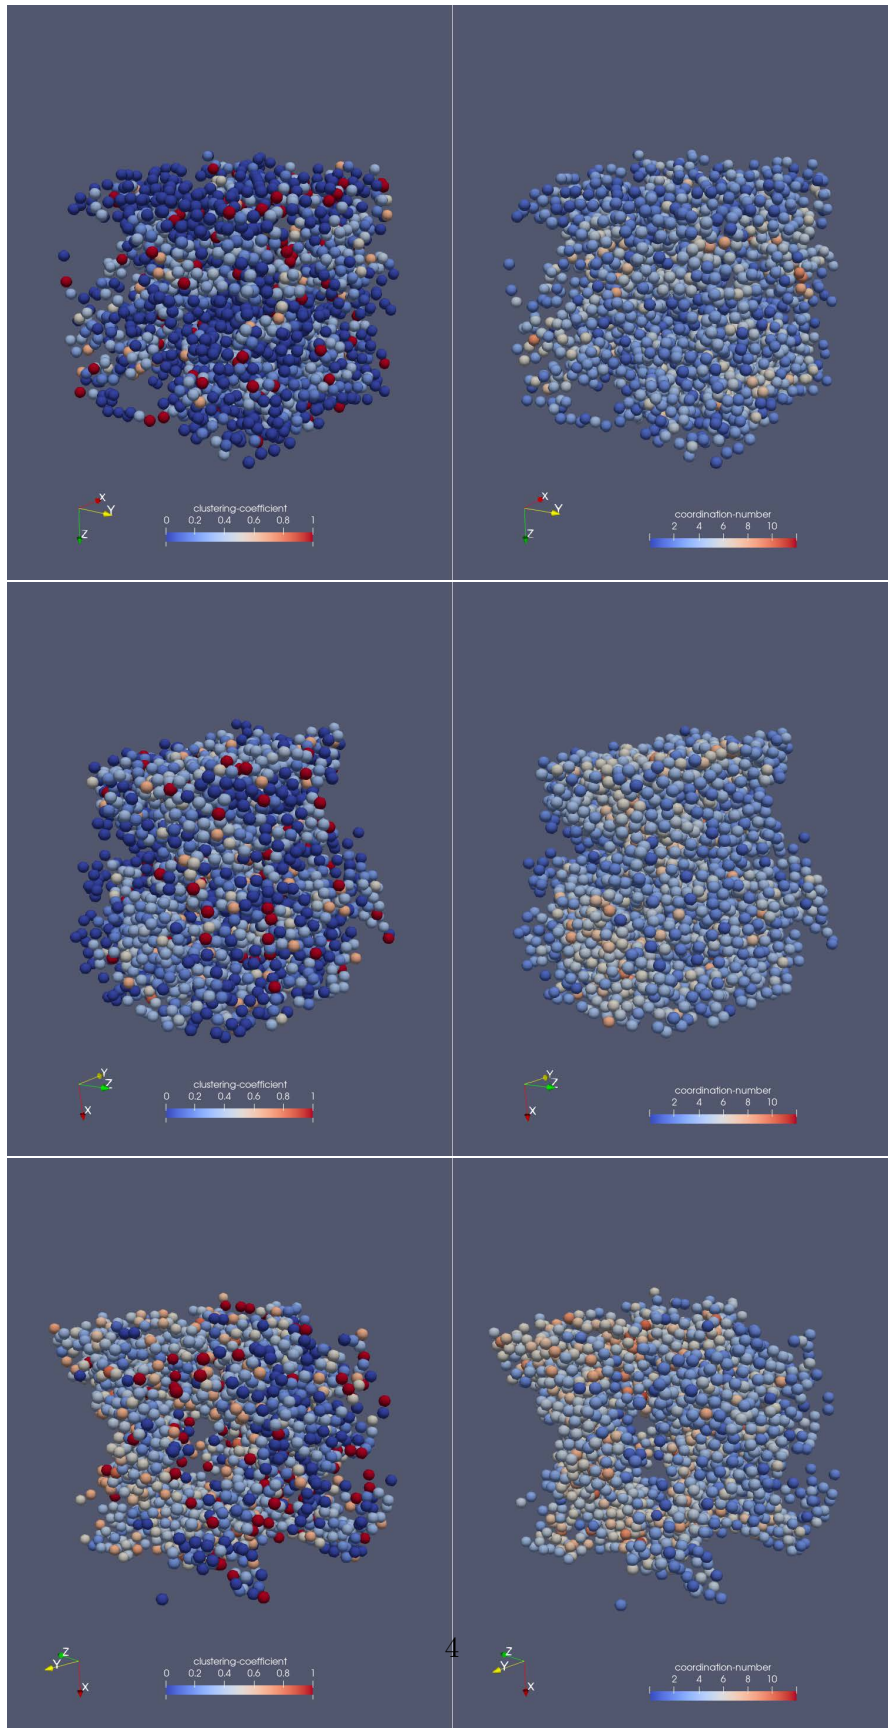

Figure S4: Representative 3D structures for points IV, V and VI with a contact angle of  $\theta = 87 \pm 8^\circ$  for several amounts of secondary fluid.



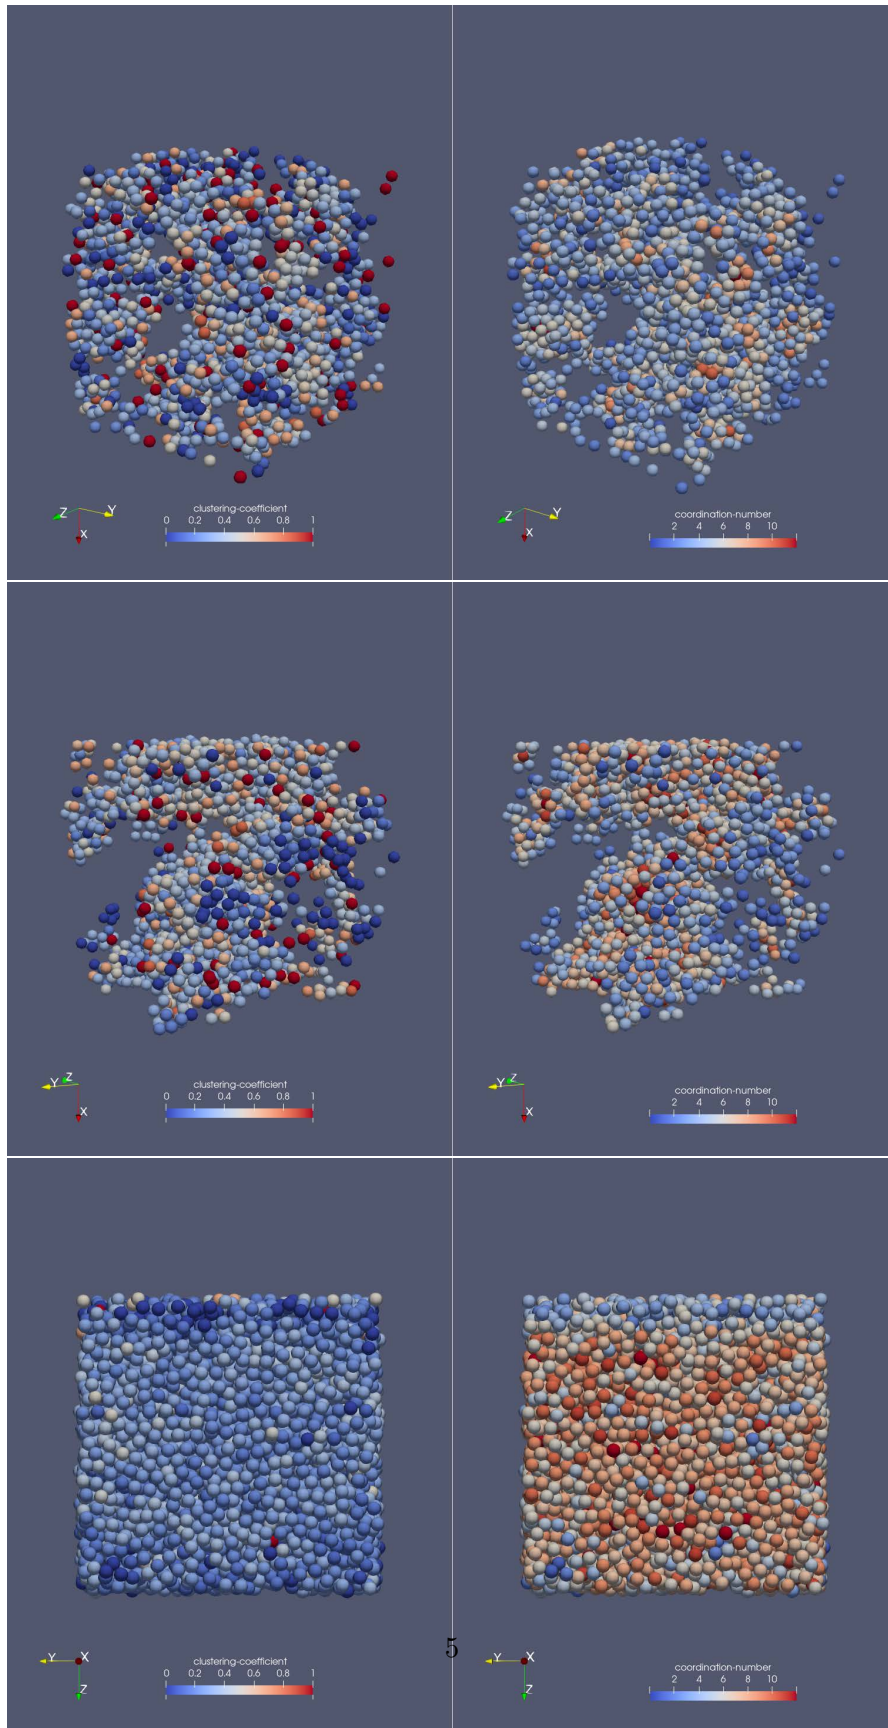

Figure S5: Representative 3D structures for points VII, VIII and IX with a contact angle of  $\theta = 87 \pm 8^\circ$  for several amounts of secondary fluid.

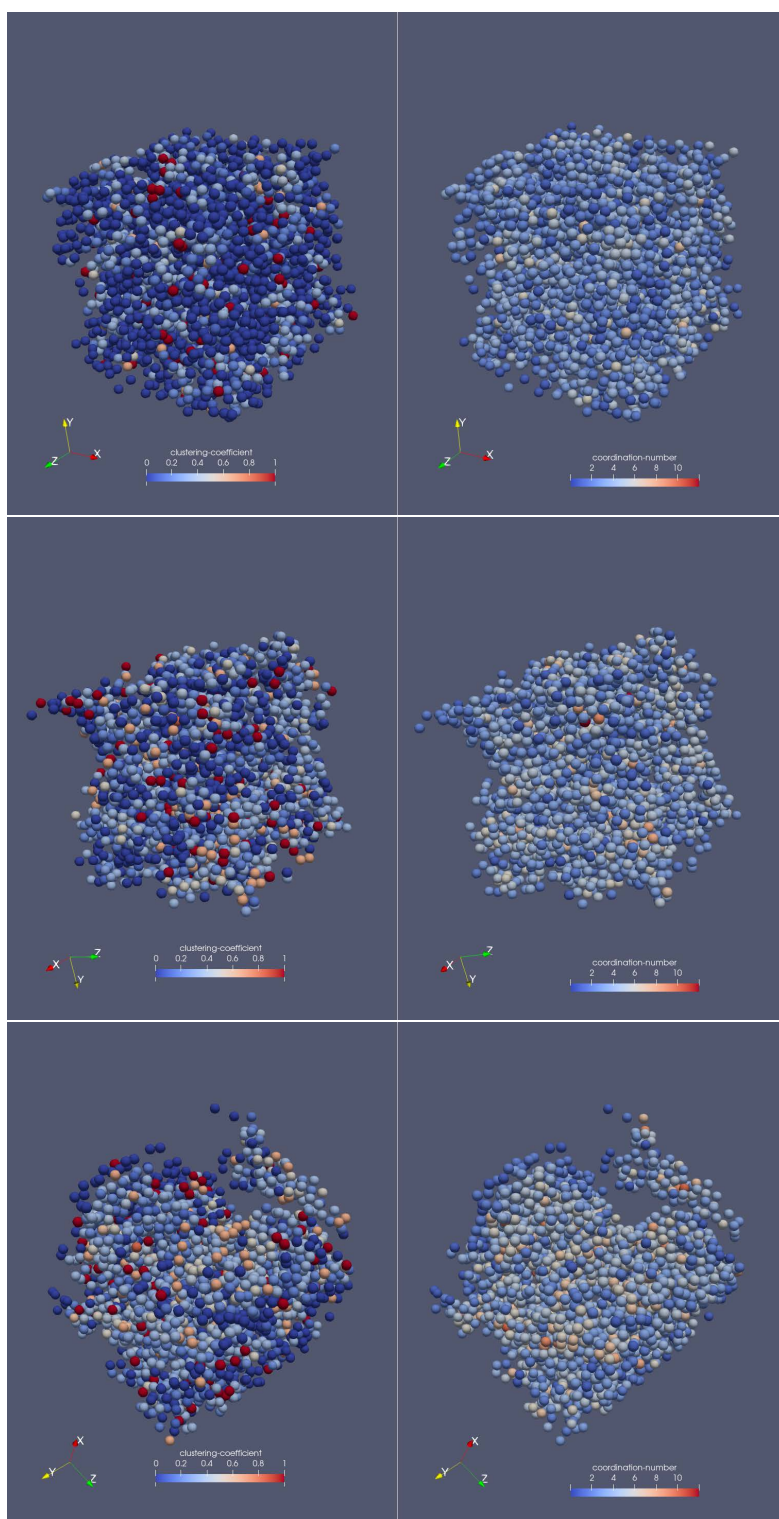

Figure S6: Representative 3D structures for points I, II and III with a contact angle of  $\theta = 115 \pm 8^\circ$  for several amounts of secondary fluid.

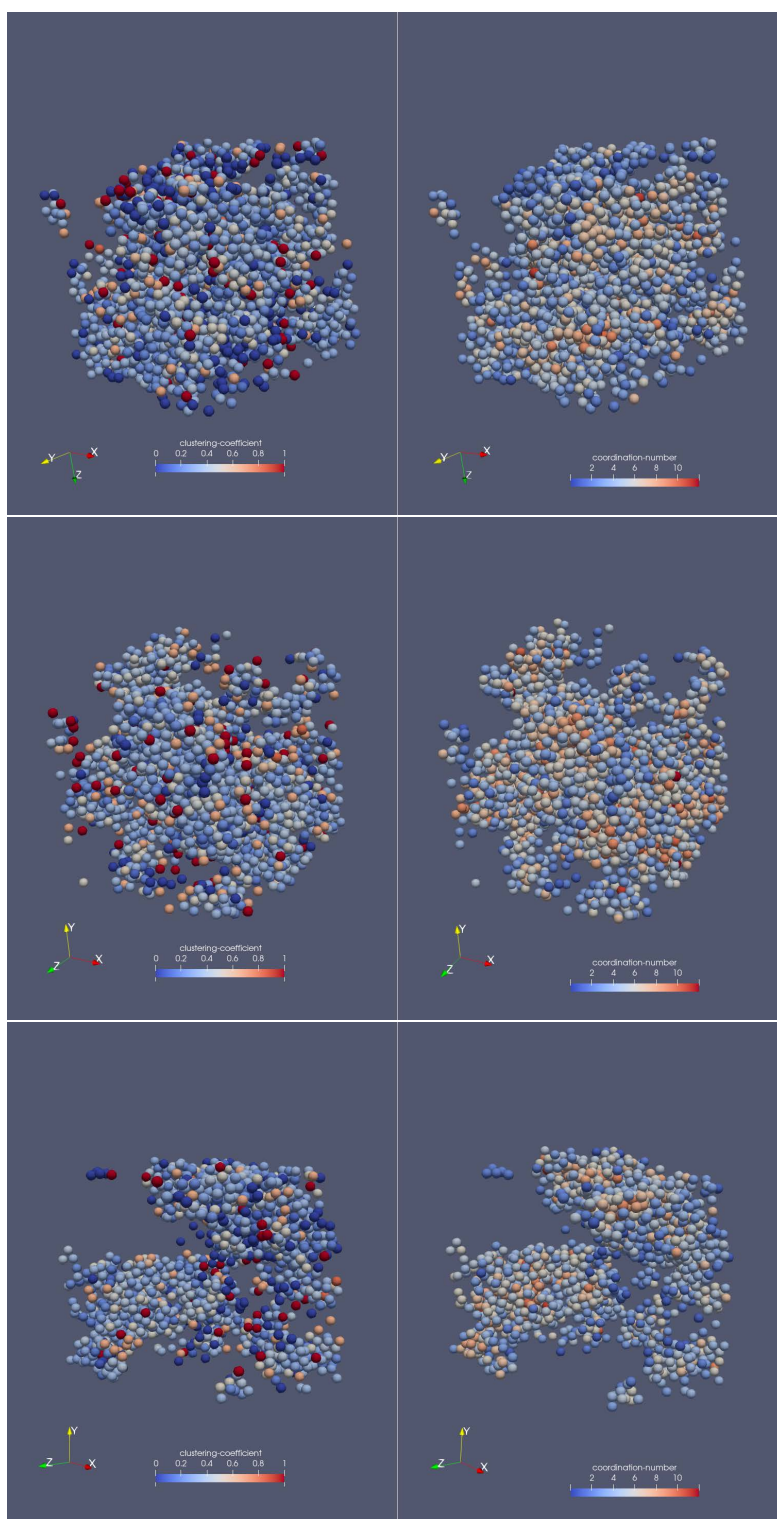

Figure S7: Representative 3D structures for points IV, V and VI with a contact angle of  $\theta = 115 \pm 8^\circ$  for several amounts of secondary fluid.

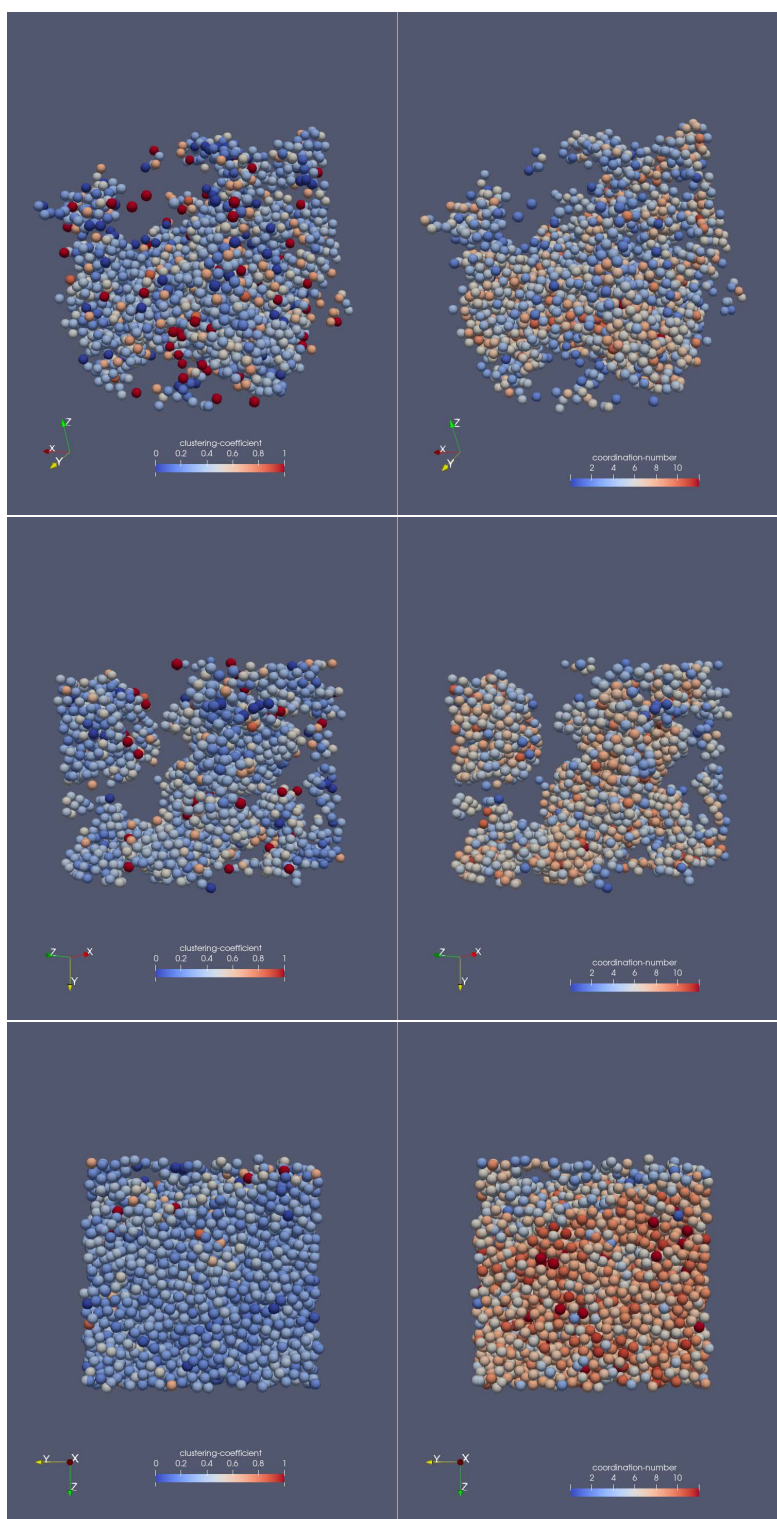

Figure S8: Representative 3D structures for points VII, VII and IX with a contact angle of  $\theta = 115 \pm 8^\circ$  for several amounts of secondary fluid.



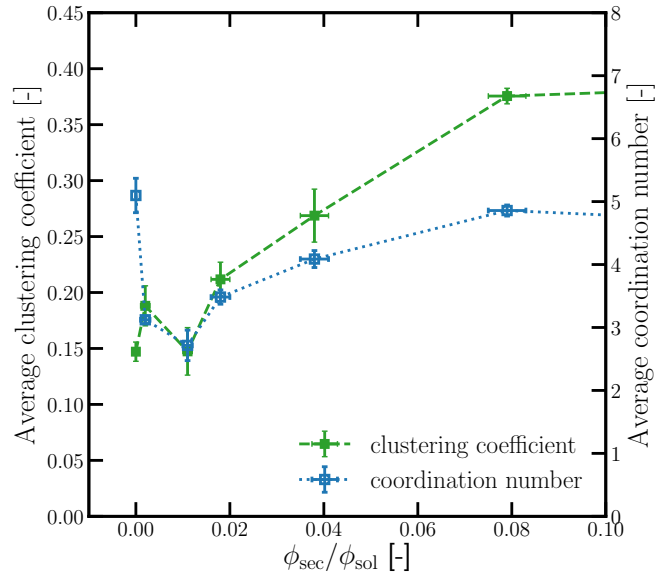

Figure S9: Zoom of the structural parameters for  $\theta = 87 \pm 8^\circ$  sample for low values of added, secondary fluid.

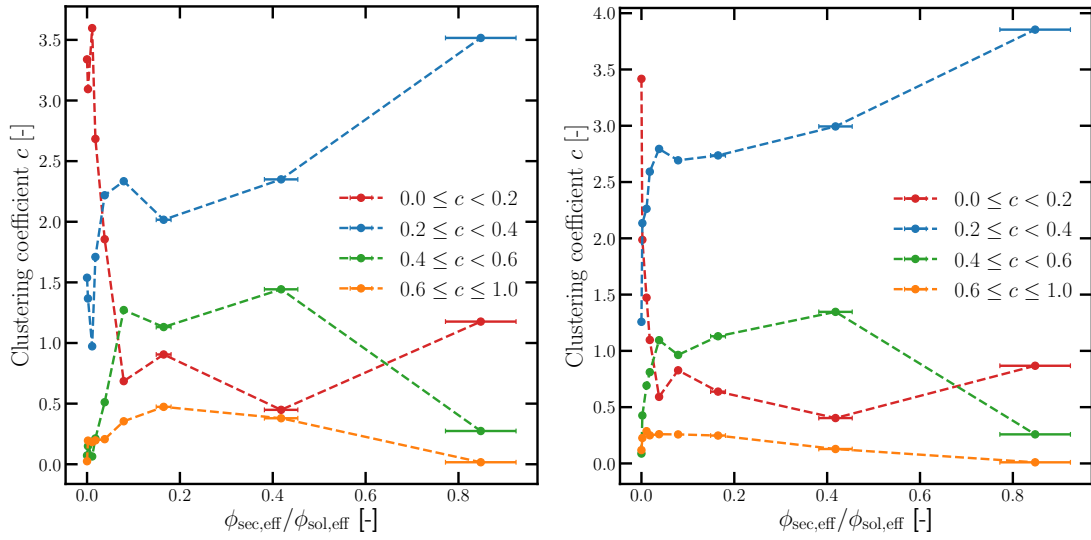

Figure S10: Dependence of different values for the clustering coefficient  $c$  on the amount of added, secondary fluid for the sample with (left)  $\theta = 87 \pm 8^\circ$  and (right)  $\theta = 115 \pm 8^\circ$ .



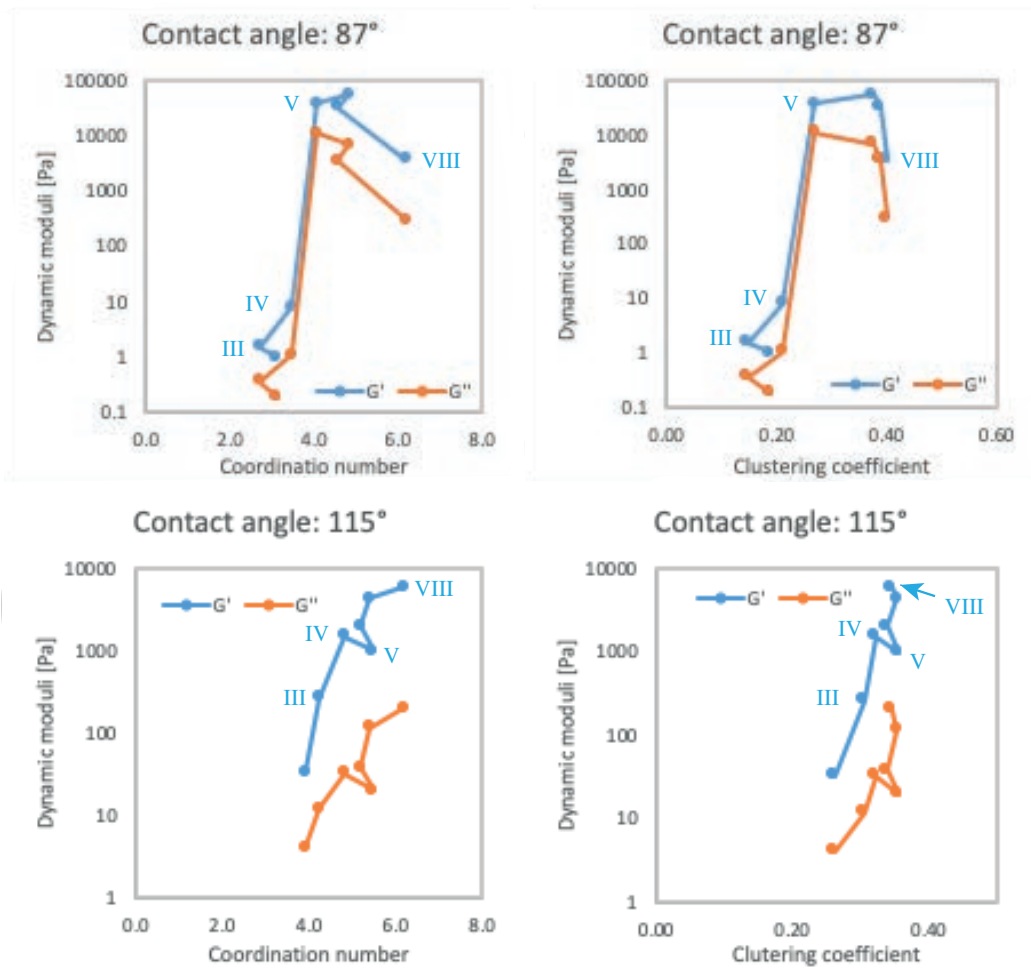

Figure S11: Direct relationship between the structural parameters and dynamic moduli.

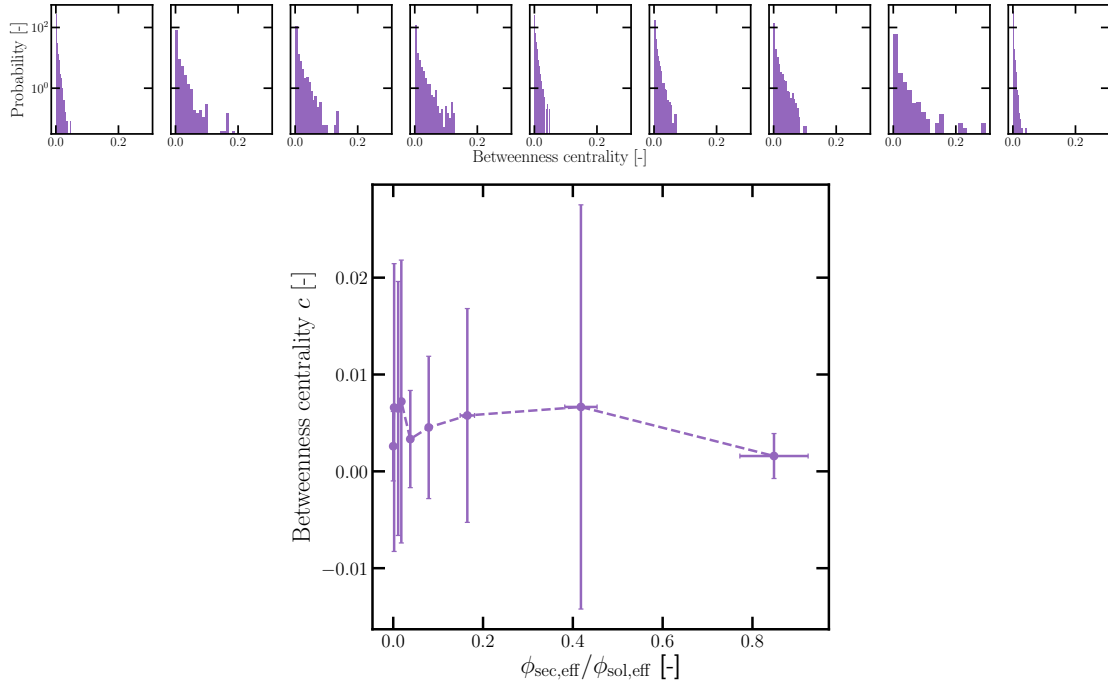

Figure S12: Histograms of betweenness centrality and corresponding averages for the  $\theta = 87 \pm 8^\circ$  samples.

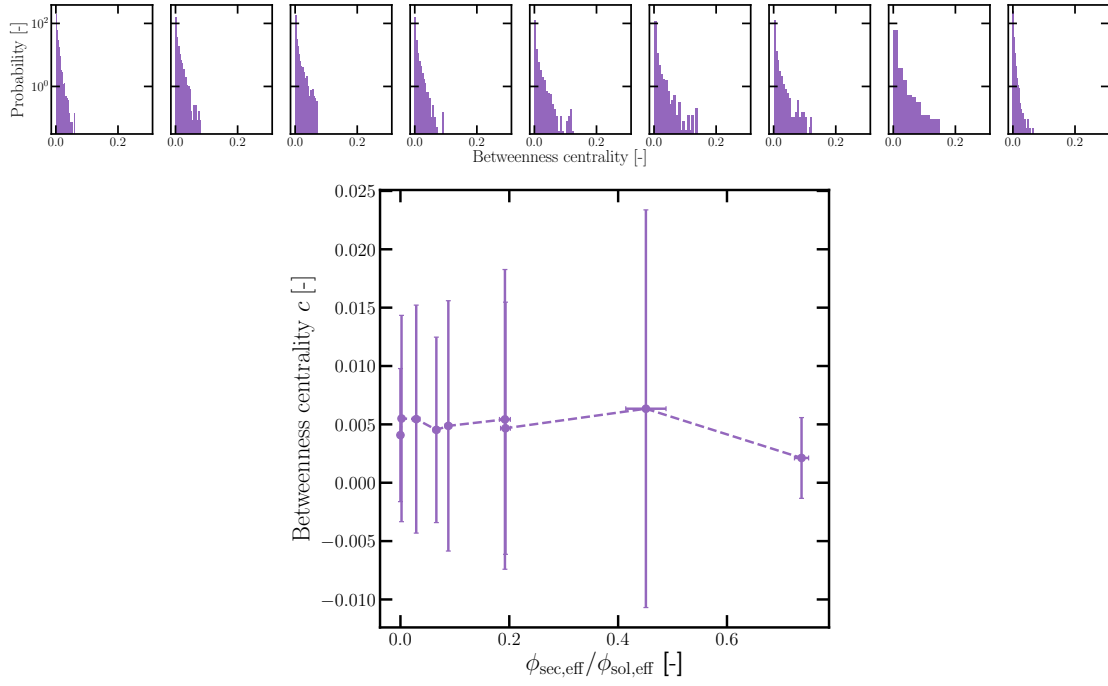

Figure S13: Histograms of betweenness centrality and corresponding averages for the  $\theta = 115 \pm 8^\circ$ .
